# Supplementary material for: BRAIDing receptors for cell-specific targeting
Source: eLife. 2024 Jan 9;12:RP90221. doi: 10.7554/eLife.90221 (PMC10945505; doi:10.7554/eLife.90221)
Supplement: Figure 2—source data 1. [file elife-90221-fig2-data1.xlsx]

## Sheet: Figure 2D
Binding kinetics of F-FGF21FL to FZD7 CRD or βKlotho
Sensor Type	Sample ID	Loading Sample ID	Cycle	Conc. (nM)	Response	KD (M)	KD Error	kon(1/Ms)	kon Error	kdis(1/s)	kdis Error	RMax	RMax Error	kobs(1/s)	Req	Req/Rmax(%)	Full X^2	Full R^2	SSG KD	SSG Rmax	SSG R^2
AHC (Anti-hIgG Fc Capture)	FZD7 CRD	F-FGF21FL	1	200	0.1407	9.232e-08	3.378e-09	51840	1847	0.004786	3.99e-05	0.2334	0.0051	0.01516	0.1597	68.4	0.0521	0.9822	1.5e-07	0.2873	0.9654
AHC (Anti-hIgG Fc Capture)	FZD7 CRD	F-FGF21FL	1	66.7	0.0697	9.232e-08	3.378e-09	51840	1847	0.004786	3.99e-05	0.2404	0.0077	0.008243	0.1008	41.9	0.0521	0.9822	1.5e-07	0.2873	0.9654
AHC (Anti-hIgG Fc Capture)	FZD7 CRD	F-FGF21FL	1	22.2	0.0214	9.232e-08	3.378e-09	51840	1847	0.004786	3.99e-05	0.1172	0.0056	0.005938	0.0227	19.4	0.0521	0.9822	1.5e-07	0.2873	0.9654
AHC (Anti-hIgG Fc Capture)	FZD7 CRD	F-FGF21FL	1	7.41	0.0008	9.232e-08	3.378e-09	51840	1847	0.004786	3.99e-05	0		0.00517	0	7.4	0.0521	0.9822	1.5e-07	0.2873	0.9654
AHC (Anti-hIgG Fc Capture)	FZD7 CRD	F-FGF21FL	1	2.47	-0.0097														1.5e-07	0.2873	0.9654
AHC (Anti-hIgG Fc Capture)	FZD7 CRD	F-FGF21FL	1	0.823	-0.0141														1.5e-07	0.2873	0.9654
AHC (Anti-hIgG Fc Capture)	FZD7 CRD	F-FGF21FL	1	0.2743	-0.0076														1.5e-07	0.2873	0.9654
AHC (Anti-hIgG Fc Capture)	βKlotho	F-FGF21FL	1	200	1.1661	1.011e-08	1.118e-10	122300	1009	0.001237	9.106e-06	1.2212	0.003	0.02569	1.1624	95.2	1.157	0.9968	8.7e-09	1.1886	0.996
AHC (Anti-hIgG Fc Capture)	βKlotho	F-FGF21FL	1	66.7	0.7718	1.011e-08	1.118e-10	122300	1009	0.001237	9.106e-06	1.1528	0.0064	0.009389	1.001	86.8	1.157	0.9968	8.7e-09	1.1886	0.996
AHC (Anti-hIgG Fc Capture)	βKlotho	F-FGF21FL	1	22.2	0.4132	1.011e-08	1.118e-10	122300	1009	0.001237	9.106e-06	1.3016	0.0106	0.003954	0.8945	68.7	1.157	0.9968	8.7e-09	1.1886	0.996
AHC (Anti-hIgG Fc Capture)	βKlotho	F-FGF21FL	1	7.41	0.1583	1.011e-08	1.118e-10	122300	1009	0.001237	9.106e-06	1.2811	0.015	0.002142	0.5416	42.3	1.157	0.9968	8.7e-09	1.1886	0.996
AHC (Anti-hIgG Fc Capture)	βKlotho	F-FGF21FL	1	2.47	0.0607	1.011e-08	1.118e-10	122300	1009	0.001237	9.106e-06	1.3033	0.0314	0.001538	0.2558	19.6	1.157	0.9968	8.7e-09	1.1886	0.996
AHC (Anti-hIgG Fc Capture)	βKlotho	F-FGF21FL	1	0.823	0.0206	1.011e-08	1.118e-10	122300	1009	0.001237	9.106e-06	1.1915	0.087	0.001337	0.0897	7.5	1.157	0.9968	8.7e-09	1.1886	0.996
AHC (Anti-hIgG Fc Capture)	βKlotho	F-FGF21FL	1	0.2743	0.0112	1.011e-08	1.118e-10	122300	1009	0.001237	9.106e-06	1.7133	0.2582	0.00127	0.0452	2.6	1.157	0.9968	8.7e-09	1.1886	0.996

## Sheet: Figure 2E
Binding kinetics of F-FGF21∆N to FZD7 CRD or βKlotho
Sensor Type	Sample ID	Loading Sample ID	Cycle	Conc. (nM)	Response	KD (M)	KD Error	kon(1/Ms)	kon Error	kdis(1/s)	kdis Error	RMax	RMax Error	kobs(1/s)	Req	Req/Rmax(%)	Full X^2	Full R^2	SSG KD	SSG Rmax	SSG R^2
AHC (Anti-hIgG Fc Capture)	FZD7 CRD	F-FGF21∆N	1	200	0.1443	8.253e-08	1.892e-09	53680	1195	0.00443	2.405e-05	0.2272	0.003	0.01517	0.1608	70.8	0.0231	0.9921	9.8e-08	0.2473	0.9551
AHC (Anti-hIgG Fc Capture)	FZD7 CRD	F-FGF21∆N	1	66.7	0.0788	8.253e-08	1.892e-09	53680	1195	0.00443	2.405e-05	0.2606	0.0051	0.008009	0.1164	44.7	0.0231	0.9921	9.8e-08	0.2473	0.9551
AHC (Anti-hIgG Fc Capture)	FZD7 CRD	F-FGF21∆N	1	22.2	0.024	8.253e-08	1.892e-09	53680	1195	0.00443	2.405e-05	0.1595	0.0042	0.005623	0.0338	21.2	0.0231	0.9921	9.8e-08	0.2473	0.9551
AHC (Anti-hIgG Fc Capture)	FZD7 CRD	F-FGF21∆N	1	7.41	0.0042	8.253e-08	1.892e-09	53680	1195	0.00443	2.405e-05	0		0.004828	0	8.2	0.0231	0.9921	9.8e-08	0.2473	0.9551
AHC (Anti-hIgG Fc Capture)	FZD7 CRD	F-FGF21∆N	1	2.47	-0.0042														9.8e-08	0.2473	0.9551
AHC (Anti-hIgG Fc Capture)	FZD7 CRD	F-FGF21∆N	1	0.823	-0.0084														9.8e-08	0.2473	0.9551
AHC (Anti-hIgG Fc Capture)	FZD7 CRD	F-FGF21∆N	1	0.2743	-0.0038														9.8e-08	0.2473	0.9551
AHC (Anti-hIgG Fc Capture)	βKlotho	F-FGF21∆N	1	200	1.158	1.175e-08	1.57e-10	165700	1873	0.001948	1.386e-05	1.1665	0.0034	0.03509	1.1017	94.4	2.1411	0.9933	1.7e-08	1.1613	0.9935
AHC (Anti-hIgG Fc Capture)	βKlotho	F-FGF21∆N	1	66.7	0.7924	1.175e-08	1.57e-10	165700	1873	0.001948	1.386e-05	1.0406	0.0069	0.013	0.8846	85	2.1411	0.9933	1.7e-08	1.1613	0.9935
AHC (Anti-hIgG Fc Capture)	βKlotho	F-FGF21∆N	1	22.2	0.4053	1.175e-08	1.57e-10	165700	1873	0.001948	1.386e-05	1.0235	0.0111	0.00563	0.6694	65.4	2.1411	0.9933	1.7e-08	1.1613	0.9935
AHC (Anti-hIgG Fc Capture)	βKlotho	F-FGF21∆N	1	7.41	0.1681	1.175e-08	1.57e-10	165700	1873	0.001948	1.386e-05	1.0508	0.0168	0.003175	0.4062	38.7	2.1411	0.9933	1.7e-08	1.1613	0.9935
AHC (Anti-hIgG Fc Capture)	βKlotho	F-FGF21∆N	1	2.47	0.0431	1.175e-08	1.57e-10	165700	1873	0.001948	1.386e-05	0.6594	0.0342	0.002357	0.1145	17.4	2.1411	0.9933	1.7e-08	1.1613	0.9935
AHC (Anti-hIgG Fc Capture)	βKlotho	F-FGF21∆N	1	0.823	0.0128	1.175e-08	1.57e-10	165700	1873	0.001948	1.386e-05	0.3791	0.098	0.002084	0.0248	6.5	2.1411	0.9933	1.7e-08	1.1613	0.9935
AHC (Anti-hIgG Fc Capture)	βKlotho	F-FGF21∆N	1	0.2743	0.0066	1.175e-08	1.57e-10	165700	1873	0.001948	1.386e-05	0.9239	0.292	0.001993	0.0211	2.3	2.1411	0.9933	1.7e-08	1.1613	0.9935

## Sheet: Figure 2F
Binding kinetics of F-FGF21∆C to FZD7 CRD or βKlotho
Sensor Type	Sample ID	Loading Sample ID	Cycle	Conc. (nM)	Response	KD (M)	KD Error	kon(1/Ms)	kon Error	kdis(1/s)	kdis Error	RMax	RMax Error	kobs(1/s)	Req	Req/Rmax(%)	Full X^2	Full R^2	SSG KD	SSG Rmax	SSG R^2
AHC (Anti-hIgG Fc Capture)	FZD7 CRD	F-FGF21∆C	1	200	0.1481	6.374e-08	1.599e-09	78060	1879	0.004976	3.512e-05	0.2096	0.0025	0.02059	0.159	75.8	0.0455	0.9849	9.5e-08	0.2351	0.986
AHC (Anti-hIgG Fc Capture)	FZD7 CRD	F-FGF21∆C	1	66.7	0.081	6.374e-08	1.599e-09	78060	1879	0.004976	3.512e-05	0.1883	0.0038	0.01018	0.0963	51.1	0.0455	0.9849	9.5e-08	0.2351	0.986
AHC (Anti-hIgG Fc Capture)	FZD7 CRD	F-FGF21∆C	1	22.2	0.0312	6.374e-08	1.599e-09	78060	1879	0.004976	3.512e-05	0.1956	0.0052	0.00671	0.0506	25.8	0.0455	0.9849	9.5e-08	0.2351	0.986
AHC (Anti-hIgG Fc Capture)	FZD7 CRD	F-FGF21∆C	1	7.41	0.0047	6.374e-08	1.599e-09	78060	1879	0.004976	3.512e-05	0.0476	0.0069	0.005554	0.005	10.4	0.0455	0.9849	9.5e-08	0.2351	0.986
AHC (Anti-hIgG Fc Capture)	FZD7 CRD	F-FGF21∆C	1	2.47	-0.0074														9.5e-08	0.2351	0.986
AHC (Anti-hIgG Fc Capture)	FZD7 CRD	F-FGF21∆C	1	0.823	-0.006														9.5e-08	0.2351	0.986
AHC (Anti-hIgG Fc Capture)	FZD7 CRD	F-FGF21∆C	1	0.2743	-0.0085														9.5e-08	0.2351	0.986
AHC (Anti-hIgG Fc Capture)	βKlotho	F-FGF21∆C	1	200	-0.0265	<1.0E-12		50000	0	<1.0E-07		0		0.01	0		0.5535	0
AHC (Anti-hIgG Fc Capture)	βKlotho	F-FGF21∆C	1	66.7	-0.0246	<1.0E-12		50000	0	<1.0E-07		0		0.003334	0		0.5535	0
AHC (Anti-hIgG Fc Capture)	βKlotho	F-FGF21∆C	1	22.2	-0.0188	<1.0E-12		50000	0	<1.0E-07		0		0.001111	0		0.5535	0
AHC (Anti-hIgG Fc Capture)	βKlotho	F-FGF21∆C	1	7.41	-0.0173	<1.0E-12		50000	0	<1.0E-07		0		0.0003704	0		0.5535	0
AHC (Anti-hIgG Fc Capture)	βKlotho	F-FGF21∆C	1	2.47	-0.0113	<1.0E-12		50000	0	<1.0E-07		0		0.0001235	0		0.5535	0
AHC (Anti-hIgG Fc Capture)	βKlotho	F-FGF21∆C	1	0.823	-0.0158	<1.0E-12		50000	0	<1.0E-07		0		4.115e-05	0		0.5535	0
AHC (Anti-hIgG Fc Capture)	βKlotho	F-FGF21∆C	1	0.2743	-0.0017	<1.0E-12		50000	0	<1.0E-07		0		1.372e-05	0		0.5535	0

## Sheet: Figure 2G
Binding kinetics of F-FGF21∆N∆C to FZD7 CRD or βKlotho
Sensor Type	Sample ID	Loading Sample ID	Cycle	Conc. (nM)	Response	KD (M)	KD Error	kon(1/Ms)	kon Error	kdis(1/s)	kdis Error	RMax	RMax Error	kobs(1/s)	Req	Req/Rmax(%)	Full X^2	Full R^2	SSG KD	SSG Rmax	SSG R^2
AHC (Anti-hIgG Fc Capture)	FZD7 CRD	F-FGF21∆N∆C	1	200	0.1452	5.363e-08	1.319e-09	77910	1830	0.004179	3.059e-05	0.1879	0.0021	0.01976	0.1482	78.9	0.0407	0.9861	7.9e-08	0.2151	0.9453
AHC (Anti-hIgG Fc Capture)	FZD7 CRD	F-FGF21∆N∆C	1	66.7	0.0817	5.363e-08	1.319e-09	77910	1830	0.004179	3.059e-05	0.2086	0.004	0.009373	0.1156	55.4	0.0407	0.9861	7.9e-08	0.2151	0.9453
AHC (Anti-hIgG Fc Capture)	FZD7 CRD	F-FGF21∆N∆C	1	22.2	0.0225	5.363e-08	1.319e-09	77910	1830	0.004179	3.059e-05	0.1273	0.0036	0.00591	0.0373	29.3	0.0407	0.9861	7.9e-08	0.2151	0.9453
AHC (Anti-hIgG Fc Capture)	FZD7 CRD	F-FGF21∆N∆C	1	7.41	0.0036	5.363e-08	1.319e-09	77910	1830	0.004179	3.059e-05	0		0.004756	0	12.1	0.0407	0.9861	7.9e-08	0.2151	0.9453
AHC (Anti-hIgG Fc Capture)	FZD7 CRD	F-FGF21∆N∆C	1	2.47	-0.0049														7.9e-08	0.2151	0.9453
AHC (Anti-hIgG Fc Capture)	FZD7 CRD	F-FGF21∆N∆C	1	0.823	-0.0064														7.9e-08	0.2151	0.9453
AHC (Anti-hIgG Fc Capture)	FZD7 CRD	F-FGF21∆N∆C	1	0.2743	-0.0045														7.9e-08	0.2151	0.9453
AHC (Anti-hIgG Fc Capture)	βKlotho	F-FGF21∆N∆C	1	200	-0.0138	<1.0E-12		50000	0	<1.0E-07		0		0.01	0		0.3373	0
AHC (Anti-hIgG Fc Capture)	βKlotho	F-FGF21∆N∆C	1	66.7	-0.0147	<1.0E-12		50000	0	<1.0E-07		0		0.003334	0		0.3373	0
AHC (Anti-hIgG Fc Capture)	βKlotho	F-FGF21∆N∆C	1	22.2	-0.0204	<1.0E-12		50000	0	<1.0E-07		0		0.001111	0		0.3373	0
AHC (Anti-hIgG Fc Capture)	βKlotho	F-FGF21∆N∆C	1	7.41	-0.0176	<1.0E-12		50000	0	<1.0E-07		0		0.0003704	0		0.3373	0
AHC (Anti-hIgG Fc Capture)	βKlotho	F-FGF21∆N∆C	1	2.47	-0.0099	<1.0E-12		50000	0	<1.0E-07		0		0.0001235	0		0.3373	0
AHC (Anti-hIgG Fc Capture)	βKlotho	F-FGF21∆N∆C	1	0.823	-0.0135	<1.0E-12		50000	0	<1.0E-07		0		4.115e-05	0		0.3373	0
AHC (Anti-hIgG Fc Capture)	βKlotho	F-FGF21∆N∆C	1	0.2743	-0.0066	<1.0E-12		50000	0	<1.0E-07		0		1.372e-05	0		0.3373	0

## Sheet: Figure 2H
Binding kinetics of L-39F7 to LRP6E3E4 or βKlotho
Sensor Type	Sample ID	Loading Sample ID	Cycle	Conc. (nM)	Response	KD (M)	KD Error	kon(1/Ms)	kon Error	kdis(1/s)	kdis Error	RMax	RMax Error	kobs(1/s)	Req	Req/Rmax(%)	Full X^2	Full R^2	SSG KD	SSG Rmax	SSG R^2
AHC (Anti-hIgG Fc Capture)	LRP6E3E4	L-39F7	1	200	0.7243	6.396e-09	5.597e-11	156300	938.1	0.0009998	6.367e-06	0.7329	0.0011	0.03226	0.7102	96.9	0.2822	0.9982	3.2e-09	0.7393	0.9628
AHC (Anti-hIgG Fc Capture)	LRP6E3E4	L-39F7	1	66.7	0.538	6.396e-09	5.597e-11	156300	938.1	0.0009998	6.367e-06	0.7259	0.0025	0.01142	0.6623	91.2	0.2822	0.9982	3.2e-09	0.7393	0.9628
AHC (Anti-hIgG Fc Capture)	LRP6E3E4	L-39F7	1	22.2	0.3174	6.396e-09	5.597e-11	156300	938.1	0.0009998	6.367e-06	0.8598	0.0048	0.004473	0.6677	77.6	0.2822	0.9982	3.2e-09	0.7393	0.9628
AHC (Anti-hIgG Fc Capture)	LRP6E3E4	L-39F7	1	7.41	0.1609	6.396e-09	5.597e-11	156300	938.1	0.0009998	6.367e-06	1.148	0.008	0.002158	0.616	53.7	0.2822	0.9982	3.2e-09	0.7393	0.9628
AHC (Anti-hIgG Fc Capture)	LRP6E3E4	L-39F7	1	2.47	0.054	6.396e-09	5.597e-11	156300	938.1	0.0009998	6.367e-06	1.0461	0.0128	0.001386	0.2914	27.9	0.2822	0.9982	3.2e-09	0.7393	0.9628
AHC (Anti-hIgG Fc Capture)	LRP6E3E4	L-39F7	1	0.823	0.0156	6.396e-09	5.597e-11	156300	938.1	0.0009998	6.367e-06	0.6883	0.0323	0.001128	0.0785	11.4	0.2822	0.9982	3.2e-09	0.7393	0.9628
AHC (Anti-hIgG Fc Capture)	LRP6E3E4	L-39F7	1	0.2743	0.0055	6.396e-09	5.597e-11	156300	938.1	0.0009998	6.367e-06	0.7695	0.0955	0.001043	0.0316	4.1	0.2822	0.9982	3.2e-09	0.7393	0.9628
AHC (Anti-hIgG Fc Capture)	βKlotho	L-39F7	1	200	0.194	1.666e-09	4.092e-10	25390	686.8	4.231e-05	1.033e-05	0.3714	0.0072	0.005121	0.3684	99.2	0.0248	0.9973	2.7e-08	0.4633	0.8337
AHC (Anti-hIgG Fc Capture)	βKlotho	L-39F7	1	66.7	0.0874	1.666e-09	4.092e-10	25390	686.8	4.231e-05	1.033e-05	0.3915	0.0098	0.001735	0.3819	97.6	0.0248	0.9973	2.7e-08	0.4633	0.8337
AHC (Anti-hIgG Fc Capture)	βKlotho	L-39F7	1	22.2	0.024	1.666e-09	4.092e-10	25390	686.8	4.231e-05	1.033e-05	0.2647	0.0076	0.0006065	0.2463	93	0.0248	0.9973	2.7e-08	0.4633	0.8337
AHC (Anti-hIgG Fc Capture)	βKlotho	L-39F7	1	7.41	0.0048	1.666e-09	4.092e-10	25390	686.8	4.231e-05	1.033e-05	0		0.0002304	0	81.6	0.0248	0.9973	2.7e-08	0.4633	0.8337
AHC (Anti-hIgG Fc Capture)	βKlotho	L-39F7	1	2.47	0.0022														2.7e-08	0.4633	0.8337
AHC (Anti-hIgG Fc Capture)	βKlotho	L-39F7	1	0.823	-0.0077														2.7e-08	0.4633	0.8337
AHC (Anti-hIgG Fc Capture)	βKlotho	L-39F7	1	0.2743	-0.0016														2.7e-08	0.4633	0.8337

## Sheet: Figure 2I
Binding kinetics of αGFP-39F7 to LRP6E3E4 or βKlotho
Sensor Type	Sample ID	Loading Sample ID	Cycle	Conc. (nM)	Response	KD (M)	KD Error	kon(1/Ms)	kon Error	kdis(1/s)	kdis Error	RMax	RMax Error	kobs(1/s)	Req	Req/Rmax(%)	Full X^2	Full R^2	SSG KD	SSG Rmax	SSG R^2
AHC (Anti-hIgG Fc Capture)	LRP6E3E4	aGFP-39F7	1	200	-0.016	1.219e-11		50000	0	6.096e-07	<1.0E-07	0		0.01	0		0.5365	0
AHC (Anti-hIgG Fc Capture)	LRP6E3E4	aGFP-39F7	1	66.7	-0.0149	1.219e-11		50000	0	6.096e-07	<1.0E-07	0		0.003334	0		0.5365	0
AHC (Anti-hIgG Fc Capture)	LRP6E3E4	aGFP-39F7	1	22.2	-0.0192	1.219e-11		50000	0	6.096e-07	<1.0E-07	0		0.001112	0		0.5365	0
AHC (Anti-hIgG Fc Capture)	LRP6E3E4	aGFP-39F7	1	7.41	-0.0141	1.219e-11		50000	0	6.096e-07	<1.0E-07	0		0.000371	0		0.5365	0
AHC (Anti-hIgG Fc Capture)	LRP6E3E4	aGFP-39F7	1	2.47	-0.014	1.219e-11		50000	0	6.096e-07	<1.0E-07	0		0.0001241	0		0.5365	0
AHC (Anti-hIgG Fc Capture)	LRP6E3E4	aGFP-39F7	1	0.823	-0.0139	1.219e-11		50000	0	6.096e-07	<1.0E-07	0		4.176e-05	0		0.5365	0
AHC (Anti-hIgG Fc Capture)	LRP6E3E4	aGFP-39F7	1	0.2743	-0.0065	1.219e-11		50000	0	6.096e-07	<1.0E-07	0		1.432e-05	0		0.5365	0
AHC (Anti-hIgG Fc Capture)	βKlotho	aGFP-39F7	1	200	0.3025	<1.0E-12	1.638e-10	26120	289.7	<1.0E-07		0.5705	0.0045	0.005223	0.5705	100	0.0108	0.9995	4.8e-09	0.6379	0.82
AHC (Anti-hIgG Fc Capture)	βKlotho	aGFP-39F7	1	66.7	0.1418	<1.0E-12	1.638e-10	26120	289.7	<1.0E-07		0.6241	0.0064	0.001741	0.6241	100	0.0108	0.9995	4.8e-09	0.6379	0.82
AHC (Anti-hIgG Fc Capture)	βKlotho	aGFP-39F7	1	22.2	0.047	<1.0E-12	1.638e-10	26120	289.7	<1.0E-07		0.5813	0.0066	0.0005803	0.5813	100	0.0108	0.9995	4.8e-09	0.6379	0.82
AHC (Anti-hIgG Fc Capture)	βKlotho	aGFP-39F7	1	7.41	0.0121	<1.0E-12	1.638e-10	26120	289.7	<1.0E-07		0.349	0.0061	0.0001934	0.349	100	0.0108	0.9995	4.8e-09	0.6379	0.82
AHC (Anti-hIgG Fc Capture)	βKlotho	aGFP-39F7	1	2.47	-0.0059														4.8e-09	0.6379	0.82
AHC (Anti-hIgG Fc Capture)	βKlotho	aGFP-39F7	1	0.823	-0.0071														4.8e-09	0.6379	0.82
AHC (Anti-hIgG Fc Capture)	βKlotho	aGFP-39F7	1	0.2743	-0.0055														4.8e-09	0.6379	0.82

## Sheet: Figure 2J
Binding kinetics of L-αGFP to LRP6E3E4 or βKlotho
Sensor Type	Sample ID	Loading Sample ID	Cycle	Conc. (nM)	Response	KD (M)	KD Error	kon(1/Ms)	kon Error	kdis(1/s)	kdis Error	RMax	RMax Error	kobs(1/s)	Req	Req/Rmax(%)	Full X^2	Full R^2	SSG KD	SSG Rmax	SSG R^2
AHC (Anti-hIgG Fc Capture)	LRP6E3E4	L-αGFP	1	200	0.6527	9.657e-09	6.97e-11	112700	580.5	0.001088	5.5e-06	0.6966	0.0011	0.02362	0.6645	95.4	0.1399	0.9988	7.6e-09	0.6839	0.9857
AHC (Anti-hIgG Fc Capture)	LRP6E3E4	L-αGFP	1	66.7	0.421	9.657e-09	6.97e-11	112700	580.5	0.001088	5.5e-06	0.6713	0.0024	0.008601	0.5864	87.3	0.1399	0.9988	7.6e-09	0.6839	0.9857
AHC (Anti-hIgG Fc Capture)	LRP6E3E4	L-αGFP	1	22.2	0.2197	9.657e-09	6.97e-11	112700	580.5	0.001088	5.5e-06	0.7672	0.004	0.003592	0.5348	69.7	0.1399	0.9988	7.6e-09	0.6839	0.9857
AHC (Anti-hIgG Fc Capture)	LRP6E3E4	L-αGFP	1	7.41	0.0839	9.657e-09	6.97e-11	112700	580.5	0.001088	5.5e-06	0.8201	0.0058	0.001923	0.356	43.4	0.1399	0.9988	7.6e-09	0.6839	0.9857
AHC (Anti-hIgG Fc Capture)	LRP6E3E4	L-αGFP	1	2.47	0.0304	9.657e-09	6.97e-11	112700	580.5	0.001088	5.5e-06	0.7911	0.0116	0.001366	0.1611	20.4	0.1399	0.9988	7.6e-09	0.6839	0.9857
AHC (Anti-hIgG Fc Capture)	LRP6E3E4	L-αGFP	1	0.823	-0.0024	9.657e-09	6.97e-11	112700	580.5	0.001088	5.5e-06	0		0.001181	0	7.9	0.1399	0.9988	7.6e-09	0.6839	0.9857
AHC (Anti-hIgG Fc Capture)	LRP6E3E4	L-αGFP	1	0.2743	0.0069	9.657e-09	6.97e-11	112700	580.5	0.001088	5.5e-06	1.2221	0.0949	0.001119	0.0338	2.8	0.1399	0.9988	7.6e-09	0.6839	0.9857
AHC (Anti-hIgG Fc Capture)	βKlotho	L-αGFP	1	200	-0.0153	<1.0E-12		50000	0	<1.0E-07		0		0.01	0		0.4493	0
AHC (Anti-hIgG Fc Capture)	βKlotho	L-αGFP	1	66.7	-0.0131	<1.0E-12		50000	0	<1.0E-07		0		0.003334	0		0.4493	0
AHC (Anti-hIgG Fc Capture)	βKlotho	L-αGFP	1	22.2	-0.0143	<1.0E-12		50000	0	<1.0E-07		0		0.001111	0		0.4493	0
AHC (Anti-hIgG Fc Capture)	βKlotho	L-αGFP	1	7.41	-0.0149	<1.0E-12		50000	0	<1.0E-07		0		0.0003704	0		0.4493	0
AHC (Anti-hIgG Fc Capture)	βKlotho	L-αGFP	1	2.47	-0.0099	<1.0E-12		50000	0	<1.0E-07		0		0.0001235	0		0.4493	0
AHC (Anti-hIgG Fc Capture)	βKlotho	L-αGFP	1	0.823	-0.0138	<1.0E-12		50000	0	<1.0E-07		0		4.115e-05	0		0.4493	0
AHC (Anti-hIgG Fc Capture)	βKlotho	L-αGFP	1	0.2743	-0.0116	<1.0E-12		50000	0	<1.0E-07		0		1.372e-05	0		0.4493	0
