# Supplementary material for: BRAIDing receptors for cell-specific targeting
Source: eLife. 2024 Jan 9;12:RP90221. doi: 10.7554/eLife.90221 (PMC10945505; doi:10.7554/eLife.90221)
Supplement: Figure 3—source data 1. [file elife-90221-fig3-data1.xlsx]

## Sheet: Figure 3A
Relate to Figure 3A
Log[Protein], nM	F-FGF21FL+L-39F7			F-FGF21ΔN+L-39F7			F-FGF21ΔC+L-39F7			F-FGF21ΔNΔC+L-39F7
2	1040	40	160	600	600	40	80	120	480	80	80	240
1	440	40	80	120	80	40	40	80	40	160	80	0
0	40	40	2240	40	40	4480	80	400	40	40	40	40
-1	80	40	80	40	40	40	40	200	40	40	40	40
-2	0	80	0	40	80	40	40	40	200	40	120	40
-3	160	400	120	40	0	40	40	40	40	40	0	80
-4	120	80	40	0	0	40	80	200	40	80	40	40

## Sheet: Figure 3B
Relate to Figure 3B
Log[Protein], nM	F-FGF21FL+L-39F7			F-FGF21ΔN+L-39F7			F-FGF21ΔC+L-39F7			F-FGF21ΔNΔC+L-39F7
2	190120	210080	220040	237640	232760	242200	22040	21840	22640	17320	17120	15680
1	242480	267200	278960	342080	367440	354160	24520	26200	29800	25880	27360	25200
0	135280	151440	149880	199120	205680	198920	14840	18000	18080	16400	16560	16320
-1	25920	26760	24800	37360	34240	34600	13040	13680	13680	11280	13120	13280
-2	11720	12320	12120	12320	14360	13560	11560	11440	12280	12080	11880	11720
-3	11160	11280	11280	11480	10960	11640	12200	12000	10760	11480	11560	12080
-4	12240	11720	11200	11640	12240	12560	11760	12560	12760	12720	12920	12800

## Sheet: Figure 3C
Relate to Figure 3C
Log[Protein], nM	F-FGF21FL+L-αGFP			F-FGF21ΔN+L-αGFP			F-FGF21ΔC+L-αGFP			F-FGF21ΔNΔC+L-αGFP
2	40	40	0	120	200	120	80	80	160	280	40	40
1	80	40	0	40	80	40	0	120	0	80	40	40
0	80	80	40	80	40	40	40	0	320	0	40	40
-1	80	40	160	80	80	280	80	40	40	80	80	40
-2	0	80	80	40	80	40	40	120	40	160	0	80
-3	40	40	40	40	40	40	40	0	0	0	120	160
-4	40	40	40	40	40	0	0	40	0	40	40	0

## Sheet: Figure 3D
Relate to Figure 3D
Log[Protein], nM	F-FGF21FL+L-αGFP			F-FGF21ΔN+L-αGFP			F-FGF21ΔC+L-αGFP			F-FGF21ΔNΔC+L-αGFP
2	19760	21840	22120	24680	23040	24520	22640	24760	23400	22080	24600	22360
1	23160	21680	22280	23360	22440	26560	21440	24240	23080	37440	39720	37280
0	14320	15400	14440	15800	15240	16120	14320	15520	14480	19800	19680	20280
-1	11800	12160	11720	11400	11240	11120	11240	12040	13080	12280	13440	13520
-2	13760	11760	12120	11760	11200	12640	12160	12040	12760	11080	12760	12080
-3	11440	11000	10640	10640	11040	11880	11640	12440	11520	11280	11240	12880
-4	12200	11960	11880	12320	11240	12760	12280	11280	11480	11280	12880	11760

## Sheet: Figure 3E
Relate to Figure 3E
Log[Protein], nM	F-FGF21FL+αGFP-39F7			F-FGF21ΔN+αGFP-39F7			F-FGF21ΔC+αGFP-39F7			F-FGF21ΔNΔC+αGFP-39F7
2	40	120	480	120	80	120	40	200	120	40	40	40
1	40	120	120	200	80	120	120	120	80	120	40	80
0	80	40	40	120	80	40	160	80	80	120	80	80
-1	40	120	80	200	120	80	200	120	120	80	80	80
-2	80	40	40	40	80	40	80	120	40	80	400	80
-3	40	200	920	120	120	40	80	80	80	40	200	40
-4	40	80	40	240	40	120	40	80	120	80	120	80

## Sheet: Figure 3F
Relate to Figure 3F
Log[Protein], nM	F-FGF21FL+αGFP-39F7			F-FGF21ΔN+αGFP-39F7			F-FGF21ΔC+αGFP-39F7			F-FGF21ΔNΔC+αGFP-39F7
2	16840	16760	17440	23120	23160	25400	16720	17040	17840	14200	13120	14520
1	13120	14240	13320	14800	16040	16600	15560	16800	17720	15040	12680	14080
0	12440	13600	11960	11840	12880	12440	11720	13520	13040	11760	12680	14240
-1	12960	13600	12000	11800	12440	12360	11120	12040	12000	12840	12920	12720
-2	13800	13080	11760	11440	11800	12800	11560	11320	12600	11040	13040	12240
-3	11960	11600	11720	11640	12560	11640	11120	11920	11400	11560	11760	15120
-4	13480	15040	13840	11480	14080	13520	13160	12760	12880	11400	12680	13720

## Sheet: Figure 3G
Relates to Figure 3G
					KLB_1	KLB_2	KLB_3
Expression level normalized to HEK293					0.840238	1.30484	0.854925	HEK293
					15434.5	17185.1	6718.25	Huh7

## Sheet: Figure 3H
Relates to Figure 3H
STF assay in 2-layer cells
	RLU values in condition of Huh7 above HEK293
		F-FGF21ΔN + L-39F7	F-FGF21ΔNΔC + L-39F7	F-FGF21ΔN + L-39F7	F-FGF21ΔNΔC + L-39F7
		729080	20480	560	480
		710840	19480	600	320
		714680	21120	400	320
		689080	21200	1080	2200
		670200	21440	880	2040
		677160	22960	960	2240
	RLU values in condition of HEK293 above Huh7
		F-FGF21ΔN + L-39F7	F-FGF21ΔNΔC + L-39F7	F-FGF21ΔN + L-39F7	F-FGF21ΔNΔC + L-39F7
		720	560	674480	20520
		560	560	667520	20600
		400	680	675920	20080
		520	400	692000	21080
		320	440	680520	21240
		320	560	680960	21520
