# Supplementary material for: BRAIDing receptors for cell-specific targeting
Source: eLife. 2024 Jan 9;12:RP90221. doi: 10.7554/eLife.90221 (PMC10945505; doi:10.7554/eLife.90221)
Supplement: Figure 4—source data 1. [file elife-90221-fig4-data1.xlsx]

## Sheet: Figure 4B
Relates to Figure 4B
				KLB_1	KLB_2	KLB_3
				No detection	0.783411	1.21659	human intestinal organoids
	Normalized to intestinal organoids			43.4969	60.0396	25.9532	human hepatocytes

## Sheet: Figure 4C
Relates to Figure 4C
		Human hepatocytes		Control	F-FGF21∆N + L-39F7	F-FGF21∆N∆C + L-39F7
		Normalized AXIN2		1	22.3159	1.05702
				1	15.4015	0.933033
				1	14.05	1.13879

## Sheet: Figure 4D
Relates to Figure 4D
		Human small intestine		Control	F-FGF21∆N + L-39F7	F-FGF21∆N∆C + L-39F7
		Normalized AXIN2		1	1.13682	1.09809
				1	0.861546	1.49485
				1	1.01045	1.24401
